# Supplementary material
Source: PubMed Central journal article supplement (PMC6148383)
Supplement: NIHMS988289-supplement-ESI.pdf [file NIHMS988289-supplement-ESI.pdf]

Supporting information:

## **An all-in-one nanoparticle (AION) contrast agent for breast cancer screening with DEM-CT-MRI-NIRF imaging**

Jessica C. Hsu,<sup>1,2</sup> Pratap C. Naha,<sup>1</sup> Kristen C. Lau,<sup>1,2</sup> Peter Chhour,<sup>1,2</sup> Renee Hastings,<sup>1</sup> [Brianna F. Moon](#),<sup>1,2</sup> Joel M. Stein,<sup>1</sup> Walter R. Witschey,<sup>1</sup> Elizabeth S. McDonald,<sup>1</sup> Andrew D. A. Maidment,<sup>1</sup> and David P. Cormode<sup>1,2,3\*</sup>

<sup>1</sup>Department of Radiology, University of Pennsylvania 3400 Spruce St, 1 Silverstein, Philadelphia, PA 19104, USA.

<sup>2</sup>Department of Bioengineering, University of Pennsylvania, Philadelphia, PA, USA.

<sup>3</sup>Department of Cardiology, University of Pennsylvania, Philadelphia, PA, USA.

\*Corresponding author

E-mail: david.cormode@uphs.upenn.edu; Tel: 215-615-4656; Fax: 215-662-7868

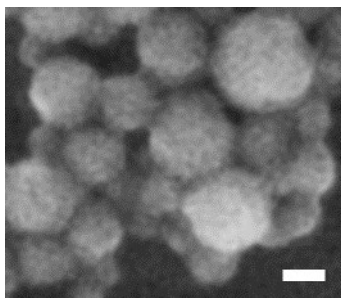

Figure S1. SEM image of AION showing the morphology of the particles (scale bar = 100 nm).

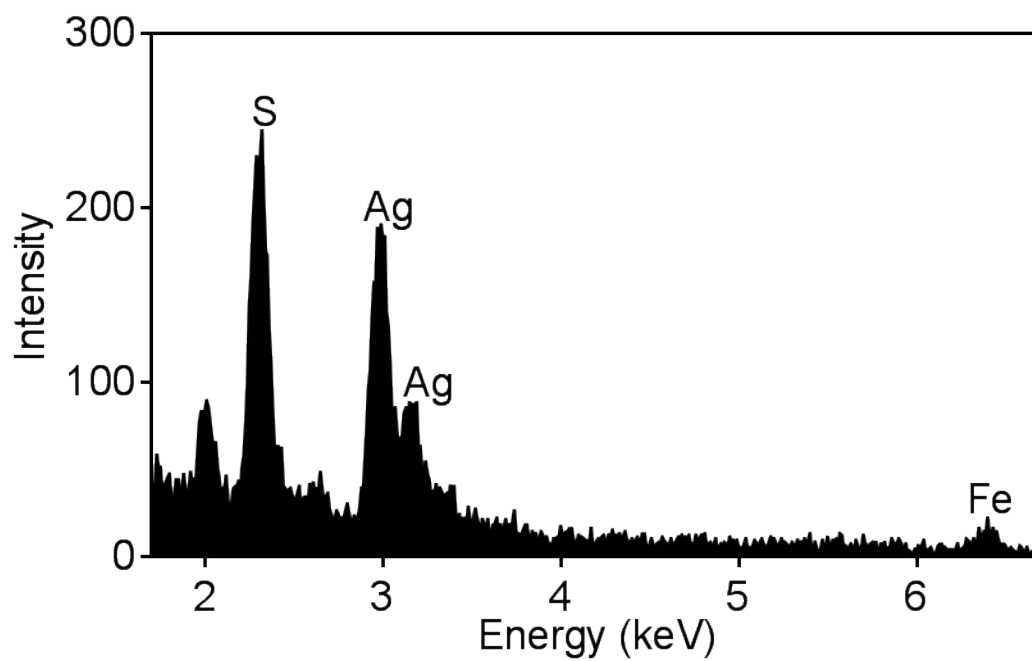

Figure S2. EDX spectrum of AION.

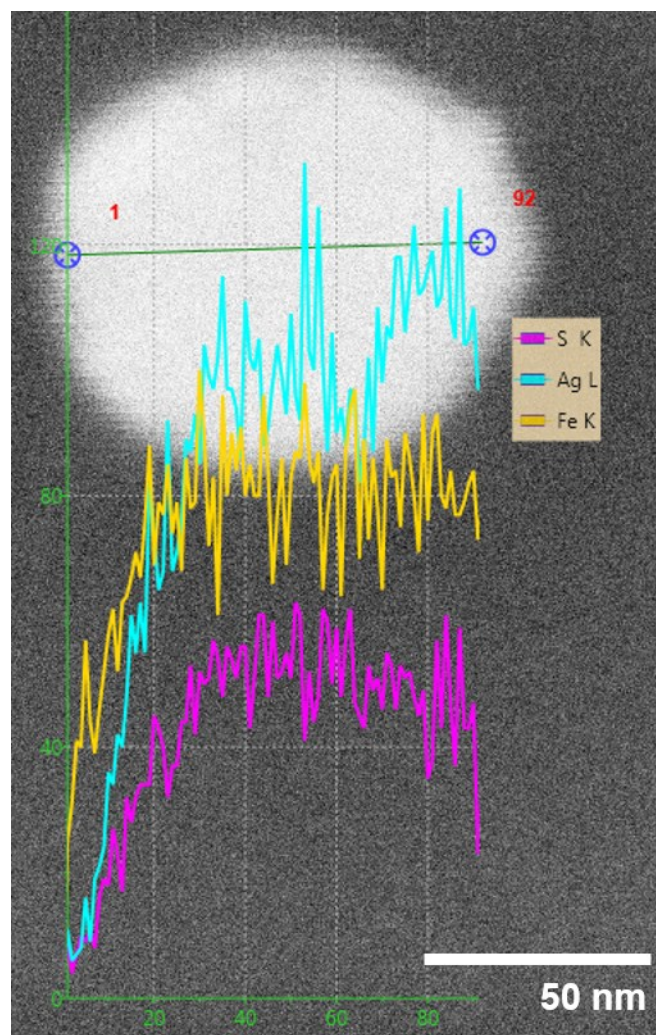

Figure S3. A representative EDX line scan across a single AION particle.

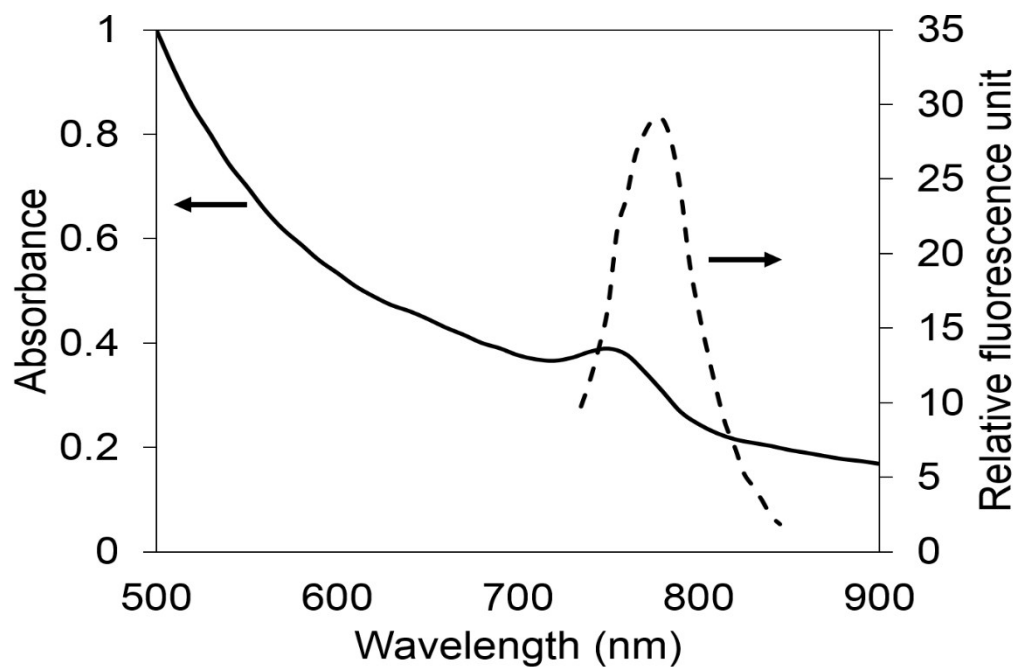

Figure S4. Absorption and fluorescence emission spectra of AION.

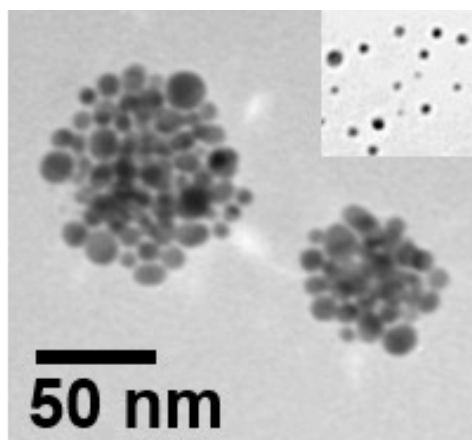

Figure S5. TEM image of AgNP with the inset showing a TEM image of as-prepared 5 nm pure silver nanoparticles (same scale bar).

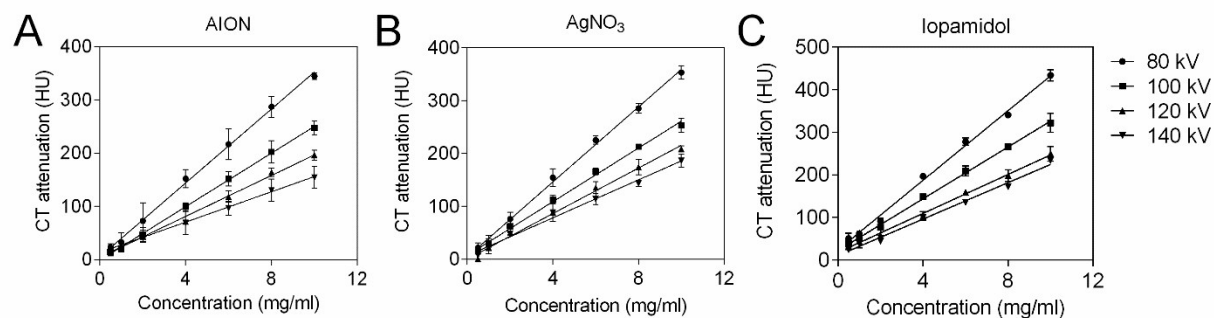

Figure S6. CT attenuation (HU) vs. concentration (mg/ml) for (A) AION, (B) AgNO<sub>3</sub> and (C) iopamidol at tube voltages of 80, 100, 120 and 140 kV.

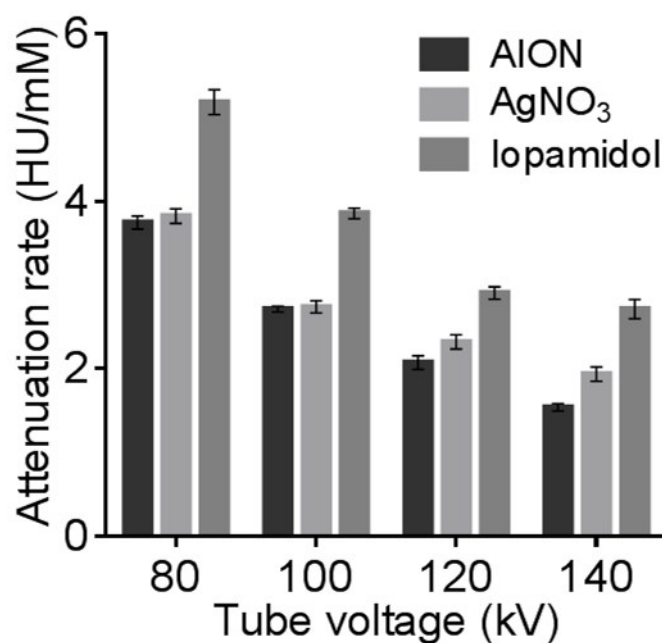

Figure S7. CT attenuation rates of different agents given in unit of HU mM<sup>-1</sup> for each tube voltage. Error bars are one standard deviation.

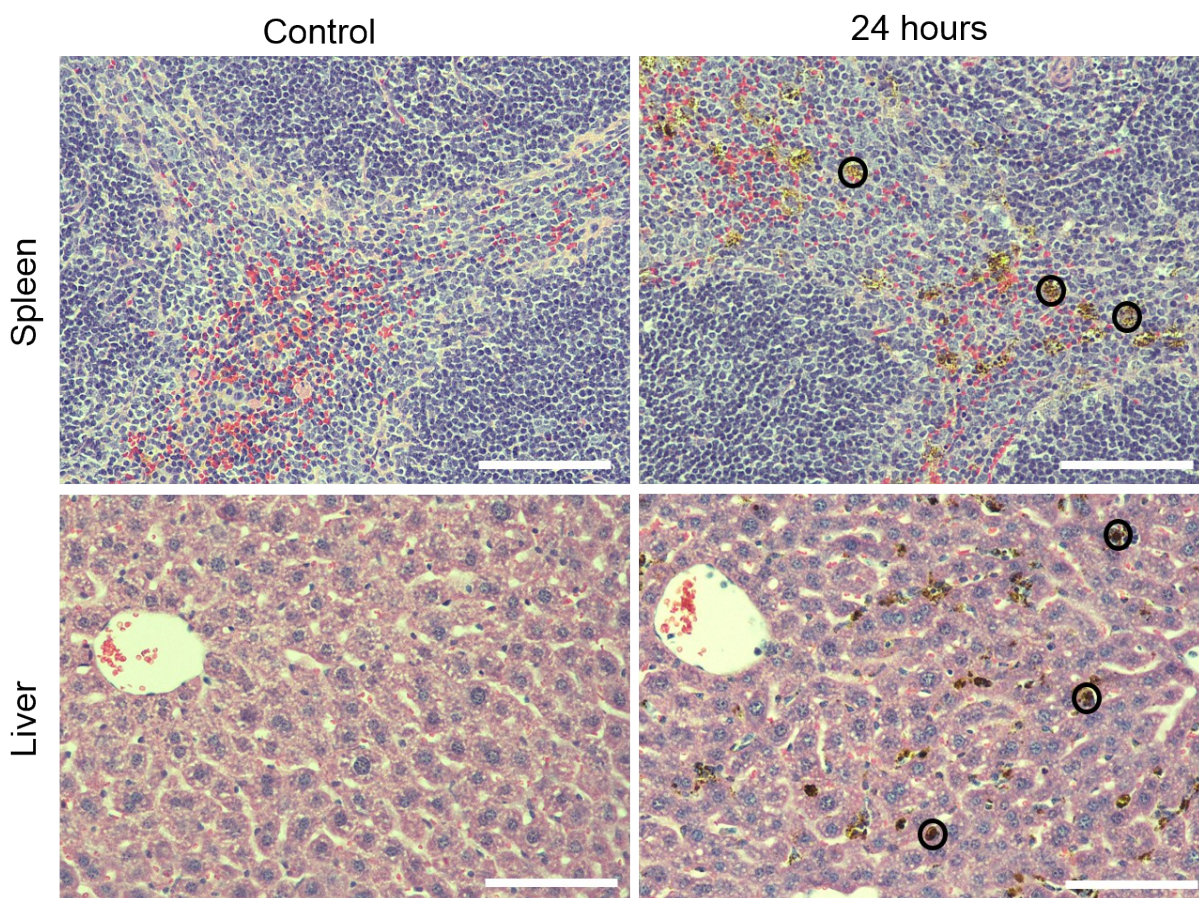

Figure S8. Representative H&E stained micrographs of major organs including liver and spleen collected from control mice and AION treated mice at 24 hours after injection. The dose of AION was 250 mg Ag/kg. No apparent organ damage or lesion was observed from the treated mice in comparison with the control. AION in these organs are indicated by black circles. Scale bar = 100  $\mu\text{m}$ .
